# Supplementary material for: Preliminary safety assessments in the high-level radioactive waste site selection procedure in Germany
Source: Copernicus journal article supplement (doi:10.5194/sand-1-37-2021), 2021-11-10
Supplement: Supplementary file 1 [file sand-1-37-2021-supplement.zip]

Archive with 2 entries (2 files):
- sand-2021-14-supplement-version1.pdf
- sand-1-37-2021-supplement-title-page.pdf
