# Supplementary material for: Preliminary safety assessments in the high-level radioactive waste site selection procedure in Germany
Source: Copernicus journal article supplement (doi:10.5194/sand-1-37-2021), 2021-11-10
Supplement: Supplementary file 1 [file sand-1-37-2021-supplement.zip › sand-1-37-2021-supplement-title-page.pdf]

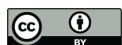

*Supplement of*

## **Preliminary safety assessments in the high-level radioactive waste site selection procedure in Germany**

**Eva-Maria Hoyer et al.**

*Correspondence to:* Wolfram Rühaak ([wolfram.ruehaak@bge.de](mailto:wolfram.ruehaak@bge.de))

- [sand-1-37-2021-supplement-title-page.pdf](#)
- [sand-2021-14-supplement-version1.pdf](#)

The copyright of individual parts of the supplement might differ from the article licence.
